# Supplementary material
Source: publisher figshare collection journal article supplement (https://acs.figshare.com/ndownloader/files/12465980)
Supplement: Supplementary file 1 [file 12465980]

## **Supporting Information**

### **Facile fabrication of N-doped magnetic porous carbon for highly efficient mercury removal**

Lijin Huang, Man He, Beibei Chen, Bin Hu\*

Key Laboratory of Analytical Chemistry for Biology and Medicine (Ministry of Education), Department of Chemistry, Wuhan University, No. 299, Bayi Road, Wuchang district, Wuhan, Hubei, 400372, China,  
Fax: 86-27-68754067, E-mail: binhu@whu.edu.cn

The supporting information contains 9 figures and 1 table in 11 pages.

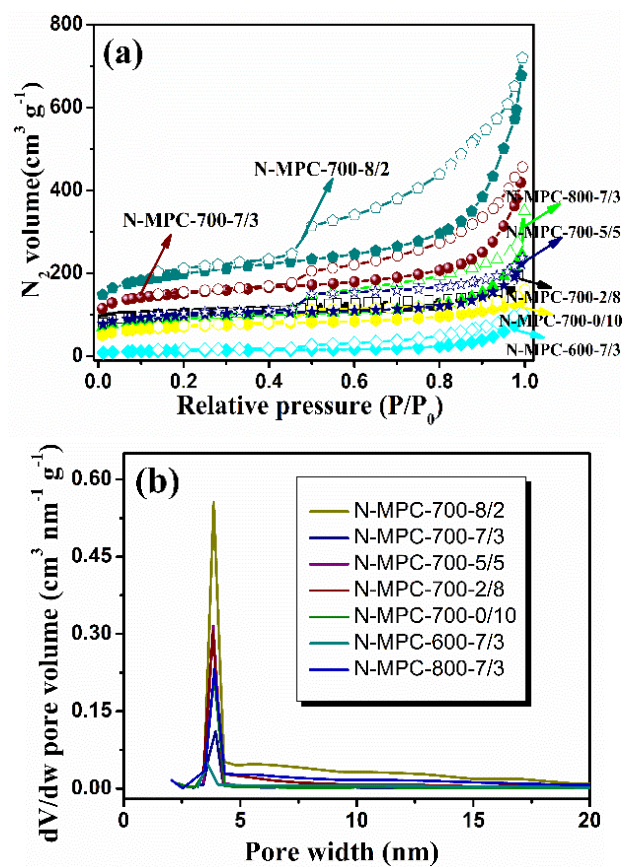

**Figure S1**  $N_2$  adsorption-desorption isotherms (a) and pore size distributions (b) of prepared N-MPCs.

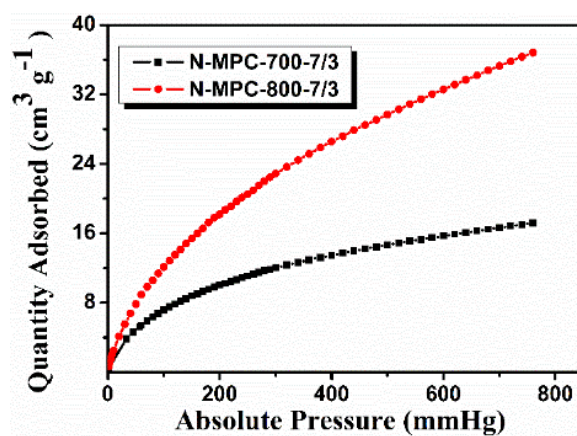

**Figure S2** CO<sub>2</sub> adsorption isotherms of N-MPC-700-7/3 and N-MPC-800-3 at 300 K.

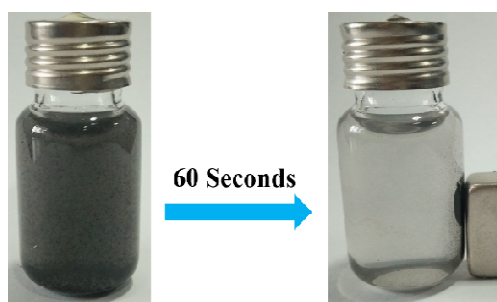

**Figure S3** Photographs of N-MPC-700-7/3 aqueous solutions before (left) and after (right) magnetic separation.

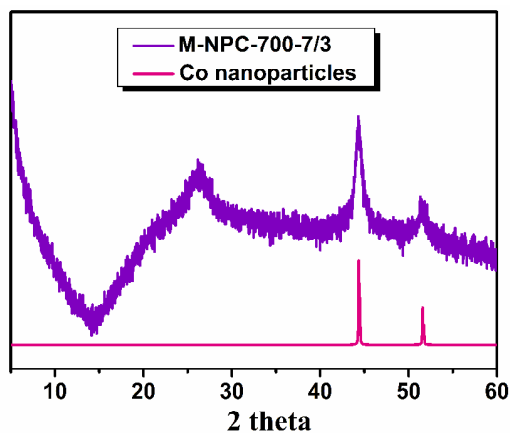

**Figure S4** Standard XRD patterns for cobalt nanoparticles and XRD patterns of N-MPC-700-7/3.

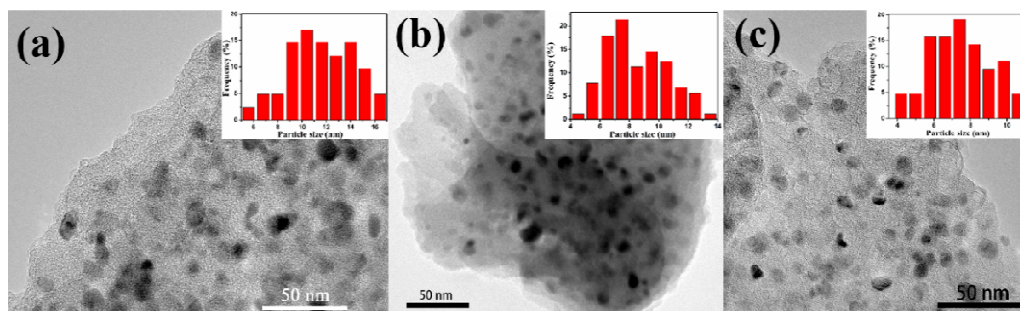

**Figure S5** TEM images of the prepared N-MPC-700-0/10 (a), N-MPC-700-7/3 (b) and N-MPC-700-8/2 (c). The insets show the size distribution of Co nanoparticles.

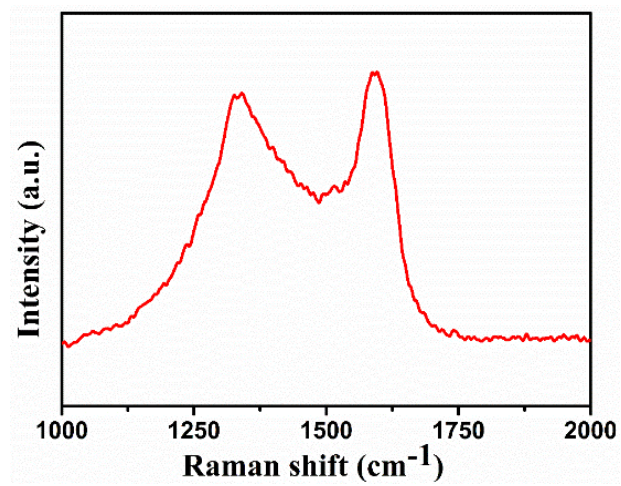

**Figure S6** Raman spectra of N-MPC-700-7/3.

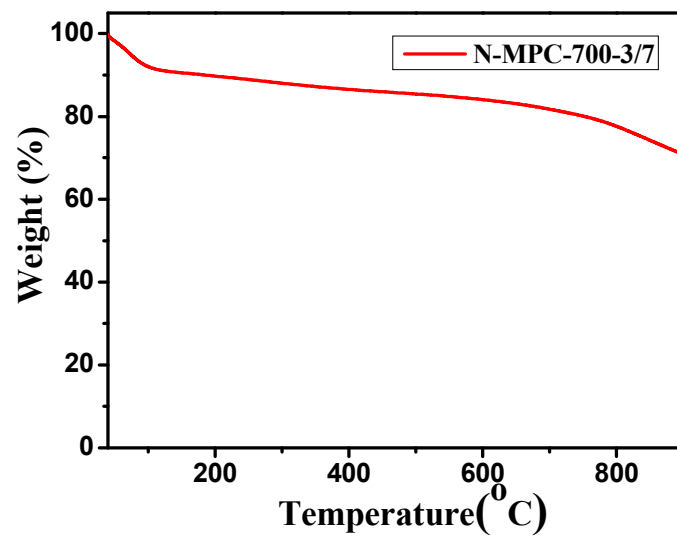

**Figure S7** TG curve of N-MPC-700-7/3.



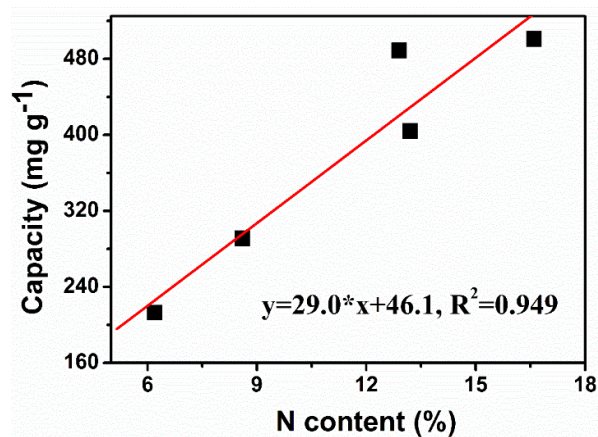

**Figure S8** N contents of N-MPCs obtained at 700 °C versus their adsorption capacity for Hg<sup>2+</sup>.

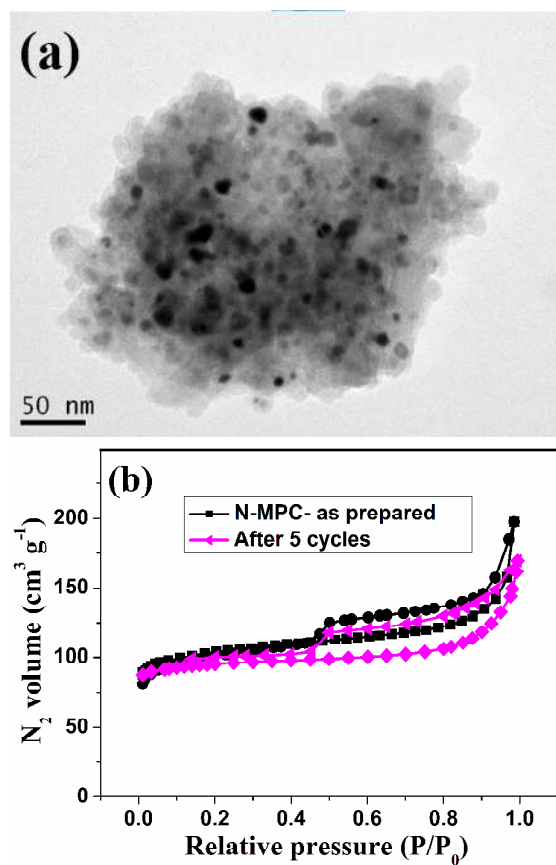

**Figure S9** TEM image (a) and N<sub>2</sub> adsorption-desorption isotherms (b) of N-MPC-700-7/3 after 5 cycles.

**Table S1** Concentration of cations in the tested lake water and domestic sewage

| Element          | Lake water (mg L <sup>-1</sup> ) | Domestic sewage (mg L <sup>-1</sup> ) |
|------------------|----------------------------------|---------------------------------------|
| K <sup>+</sup>   | 5.6                              | 15.3                                  |
| Ca <sup>2+</sup> | 46.0                             | 59.7                                  |
| Na <sup>+</sup>  | 19.4                             | 98.5                                  |
| Mg <sup>2+</sup> | 9.2                              | 11.4                                  |
| Mn <sup>2+</sup> | 0.02                             | 0.08                                  |
| Cr <sup>3+</sup> | 0.2                              | 0.5                                   |
| Cu <sup>2+</sup> | 2.0                              | 3.2                                   |
| Zn <sup>2+</sup> | 4.5                              | 7.4                                   |
| Ni <sup>2+</sup> | 2.9                              | 0.04                                  |
